# Supplementary material for: Diagenetic Study of Marrón Emperador Ornamental Stone (Upper Cretaceous, SE Spain)
Source: MDPI journal article supplement (doi:10.3390/app13095470), 2023-04-27
Supplement: s1 [file s1]

**Table S1.** Mineral and isotopic composition of ME brecciid dolostone geobody.

|          | Dolomite | Calcite | Quartz | Feldspar | %CaCO <sub>3</sub><br>(dol) | I(015)/I(110)<br>dol | δ <sup>13</sup> C <sub>VPDB</sub><br>(calcite) | δ <sup>18</sup> O <sub>VPDB</sub><br>(calcite) | δ <sup>13</sup> C <sub>VPDB</sub><br>(dolomite) | δ <sup>18</sup> O <sub>VPDB</sub><br>(dolomite) |
|----------|----------|---------|--------|----------|-----------------------------|----------------------|------------------------------------------------|------------------------------------------------|-------------------------------------------------|-------------------------------------------------|
| JUM-1    | 93,2     | -       | -      | 6,8      | 51,80                       | 0,38                 | -                                              | -                                              | -3,40                                           | -0,08                                           |
| JUM-1r   | <3       | 86,5    | 11,0   | -        | 50,20                       | -                    | -7,08                                          | -7,48                                          | -5,86                                           | -6,64                                           |
| JUM-2a   | 81       | <5      | 8,1    | 5,9      | 50,10                       | 0,50                 | -3,72                                          | -0,73                                          | -4,33                                           | -1,07                                           |
| JUM-4    | 57,3     | 42,7    | -      | -        | 53,63                       | 0,59                 | -6,98                                          | -4,98                                          | -5,14                                           | -2,00                                           |
| JUM-5a   | 65,3     | 9,7     | -      | 25       | 55,47                       | 0,44                 | -5,35                                          | 0,17                                           | -5,45                                           | -0,76                                           |
| JUM-6    | 11,6     | 71,4    | 5,9    | 11,1     | 51,47                       | 0,64                 | -7,94                                          | -6,41                                          | -5,79                                           | -1,50                                           |
| JUM-7    | 91,0     | 7,0     | 1,0    |          | 53,37                       | -                    | -6,10                                          | -0,26                                          | -6,13                                           | -0,95                                           |
| JUM-7a   | 74,6     | 18,1    | -      | 7,3      | 53,63                       | 0,57                 | -5,86                                          | -2,64                                          | -                                               | -                                               |
| JUM-7b   | 70,2     | 18,7    | -      | 11,1     | 53,63                       | 0,50                 | -5,91                                          | -1,23                                          | -4,21                                           | -0,94                                           |
| FUEN-2   | 84,5     | 8,6     | -      | 6,9      | 51,80                       | 0,44                 | -                                              | -                                              | -                                               | -                                               |
| FUEN-5-1 | 90,3     | <2      | -      | 8,4      | 55,47                       | 0,41                 | -                                              | -                                              | -                                               | -                                               |
| FUEN-5-2 | 85,4     | <5      | -      | 10,1     | 53,63                       | 0,52                 | -                                              | -                                              | -                                               | -                                               |
| JIM-1    | 72       | 19,9    | -      | 8,1      | 53,63                       | 0,83                 | -                                              | -                                              | -                                               | -                                               |
| JIM-2    | 84,8     | <5      | -      | 11       | 53,63                       | 0,39                 | -                                              | -                                              | -                                               | -                                               |
| JIM-3    | 5,1      | 86,4    | 8,5    | -        | 53,37                       |                      | -                                              | -                                              | -                                               | -                                               |
| JIM-6    | 24,2     | 66,3    | 9,5    | -        | 53,37                       | 0,37                 | -                                              | -                                              | -                                               | -                                               |
| FV-1     | 96,5     | -       | -      | <4       | 49,97                       | 0,56                 | -                                              | -                                              | -2,31                                           | -1,03                                           |
| FV-2     | 84,9     | <5      | -      | 10,8     | 53,63                       | 0,42                 | -5,38                                          | 0,00                                           | -5,00                                           | -0,67                                           |
| FV-4     | 72,8     | 5,0     | -      | 22,2     | 55,47                       | 0,37                 | -1,61                                          | 2,58                                           | -1,83                                           | 1,29                                            |
| FV-5     | 13,2     | 50,6    | 13,3   | 20,3     | 55,47                       | 0,33                 | -3,92                                          | -3,88                                          | -0,25                                           | 1,67                                            |
| CY-2B-n  | 96,0     | 3,0     | -      | -        | 53,63                       | -                    | -                                              | -                                              | -                                               | -                                               |
| CY-2B-b  | 95,0     | 4,0     | -      | -        | 53,63                       | -                    | -                                              | -                                              | -                                               | -                                               |
| CY-2B-r  | 85,0     | 10,0    | 1,0    | 2,0      | 51,80                       | -                    | -                                              | -                                              | -                                               | -                                               |
| CY-2B-e  | -        | 99,0    | -      | -        | -                           | -                    | -10,46                                         | -7,33                                          | -                                               | -                                               |
| CY-4     | 83,2     | 7,5     | -      | 8,2      | 53,63                       | 0,43                 | -2,60                                          | 0,92                                           | -3,47                                           | -0,01                                           |
| CY-5     | 86,8     | 5,3     | -      | 7,9      | 51,80                       | 0,62                 | -4,82                                          | -0,60                                          | -4,32                                           | -1,34                                           |
| CY-6     | 77,8     | 15,8    | -      | 6,4      | 51,80                       | 0,38                 | -4,09                                          | -0,18                                          | -3,77                                           | -0,68                                           |
| CY-7     | 78,7     | 6,4     | 10,5   | <5       | 49,63                       | 0,49                 | -6,89                                          | -2,45                                          | -6,07                                           | -2,23                                           |
| CY-9     | 94,0     | 5,0     | 2,0    | -        | 51,53                       |                      | -6,66                                          | -1,85                                          | -6,42                                           | -2,14                                           |
| CY-10    | 74,8     | 10,8    | -      | 14,4     | 53,63                       | 0,53                 | -6,60                                          | -2,08                                          | -5,86                                           | -1,81                                           |
| CY-11    | 88,9     | <4      | -      | 7,4      | 51,80                       | 0,34                 | -3,63                                          | 0,16                                           | -3,76                                           | -1,05                                           |
| CY-12    | 78,9     | 10,7    | -      | 10,4     | 53,63                       | 0,53                 | -3,63                                          | -0,69                                          | -3,27                                           | -1,29                                           |
| CY-14    | 86,01    | 13,99   | -      | -        | 51,80                       | 0,44                 | -6,71                                          | -1,44                                          | -6,48                                           | -1,39                                           |
| SP-3     | 15,0     | 84      | 1,0    | -        | 51,53                       | -                    | -                                              | -                                              | -                                               | -                                               |
| SP-3a    | -        | 89,8    | 10,2   | -        | -                           | -                    | -                                              | -                                              | -                                               | -                                               |
| SP-4     | 89,8     | <4      | -      | 6,5      | 51,80                       | 0,58                 | -                                              | -                                              | -                                               | -                                               |
| SP-7     | 54,9     | 45,1    | -      | -        | 53,63                       | 0,55                 | -                                              | -                                              | -                                               | -                                               |
| SPS-1    | 99,0     | -       | -      | 10       | 49,97                       | -                    | -                                              | -                                              | -                                               | -                                               |
| SPS-2    | 86,3     | 5,2     | 8,5    | -        | 49,90                       | -                    | 0,17                                           | 0,02                                           | 0,74                                            | -0,26                                           |
| SPS-3    | 89,7     | 5,4     | -      | <5       | 49,97                       | 0,52                 | -1,06                                          | -0,57                                          | 0,56                                            | -0,39                                           |
| SPS-4    | 94,1     | -       | -      | 5,9      | 49,97                       | 0,38                 | -                                              | -                                              | 1,14                                            | -0,97                                           |
| SPS-4a   | 77,4     | 15,6    | -      | 7        | 51,80                       | 0,57                 | -1,24                                          | -1,27                                          | 0,58                                            | -0,24                                           |
| SPS-5    | 76,8     | 14,4    | -      | 8,8      | 53,63                       | 0,52                 | -2,23                                          | -1,36                                          | 1,12                                            | -0,33                                           |

**Table S1 (cont).** Mineral and isotopic composition of ME brecciid dolostone geobody.

|          | Dolomite | Calcite | Quartz | Feldspar | %CaCO <sub>3</sub><br>(dol) | I(015)/<br>I(110) dol | $\delta^{13}\text{C}_{\text{VPDB}}$<br>(calcite) | $\delta^{18}\text{O}_{\text{VPDB}}$<br>(calcite) | $\delta^{13}\text{C}_{\text{VPDB}}$<br>(dolomite) | $\delta^{18}\text{O}_{\text{VPDB}}$<br>(dolomite) |
|----------|----------|---------|--------|----------|-----------------------------|-----------------------|--------------------------------------------------|--------------------------------------------------|---------------------------------------------------|---------------------------------------------------|
| SPS-6    | 100,0    | -       | -      | -        | 55,47                       | -                     | -                                                | -                                                | 1,54                                              | -0,58                                             |
| SPS-6B   | 93,0     | 6,0     | 1,0    | -        | 53,37                       | -                     | -                                                | -                                                | -                                                 | -                                                 |
| SPS-7    | 73,1     | 15,1    | -      | 11,8     | 53,63                       | 0,45                  | 0,53                                             | 0,10                                             | 1,48                                              | -0,52                                             |
| SPS-8a   | 39,0     | 42,5    | 8,6    | 9,8      | 53,63                       | 0,53                  | -6,48                                            | -4,31                                            | 0,27                                              | 0,01                                              |
| SPS-9    | 13,7     | 62,4    | 13,2   | 10,7     | 55,20                       | 0,67                  | -6,62                                            | -5,19                                            | -1,70                                             | -1,42                                             |
| SC-61    | 94,0     | 3,8     | 0,3    | -        | 53,50                       | 0,54                  | -3,99                                            | -0,49                                            | -3,32                                             | 0,32                                              |
| SC-62    | 97,5     | 2,5     | -      | -        | 55,50                       | 0,54                  | -2,87                                            | 0,34                                             | -2,39                                             | 0,28                                              |
| SC-63    | 97,5     | 2,5     | -      | -        | 52,00                       | 0,55                  | -2,61                                            | -0,04                                            | -1,87                                             | 0,26                                              |
| SC-64    | 99,0     | 1,0     | -      | -        | 54,33                       | 0,45                  | -                                                | -                                                | -2,25                                             | -0,48                                             |
| SC-65    | 99,0     | 1,0     | -      | -        | 54,03                       | 0,44                  | -                                                | -                                                | -3,56                                             | -0,49                                             |
| SC-66    | 99,0     | 1,0     | -      | -        | 57,37                       | 0,46                  | -                                                | -                                                | -4,08                                             | -0,41                                             |
| SC-67    | 99,0     | 1,0     | -      | -        | 52,17                       | 0,42                  | -                                                | -                                                | -4,42                                             | -1,25                                             |
| SC-71-A  | 99,0     | 1,0     | -      | -        | 54,03                       | 0,47                  | -                                                | -                                                | -1,95                                             | -0,74                                             |
| SC-71-B  | 95,1     | 4,9     | -      | -        | 52,71                       | -                     | -3,12                                            | -0,81                                            | -1,87                                             | 0,33                                              |
| SC-72    | 98,0     | 2,0     | -      | -        | 55,27                       | -                     | -4,09                                            | -1,07                                            | -2,50                                             | 0,50                                              |
| SC-73    | 98,5     | 1,5     | -      | -        | 55,50                       | 0,40                  | -                                                | -                                                | -3,10                                             | -0,49                                             |
| SC-74    | 99,0     | 1,0     | -      | -        | 53,50                       | 0,43                  | -                                                | -                                                | -2,05                                             | -0,10                                             |
| SC-75-A  | 96,1     | 3,9     | -      | -        | 51,83                       | 0,47                  | -4,39                                            | -0,37                                            | -4,09                                             | 0,14                                              |
| SC-75-B  | 1,9      | 97,6    | 0,5    | -        | -                           | -                     | -7,32                                            | -7,72                                            |                                                   |                                                   |
| SC-81    | 98,5     | 1,5     | -      | -        | 54,03                       | 0,49                  | -                                                | -                                                | -1,93                                             | -0,18                                             |
| SC-83    | 96,1     | 3,9     | -      | -        | 54,70                       | 0,40                  | -3,99                                            | -0,18                                            | -3,54                                             | 0,08                                              |
| SC-84    | 99,0     | 1,0     | -      | -        | 52,80                       | 0,44                  | -                                                | -                                                | -4,28                                             | -0,58                                             |
| SC-85    | 99,0     | 1,0     | -      | -        | 55,50                       | 0,36                  | -                                                | -                                                | -4,45                                             | -0,76                                             |
| S-C91-A  | 99,5     | 0,5     | -      | -        | 53,50                       | 0,44                  | -                                                | -                                                | -3,91                                             | 0,13                                              |
| SC-91-B  | 92,8     | 7,2     | -      | -        | 56,13                       | -                     | -4,33                                            | -1,10                                            | -4,06                                             | -0,54                                             |
| SC-92    | 99,0     | 1,0     | -      | -        | 52,83                       | 0,39                  | -                                                | -                                                | -3,68                                             | -0,59                                             |
| SC-93    | 84,6     | 15,4    | -      | -        | 56,37                       | -                     | -6,70                                            | -5,00                                            | -3,72                                             | -0,60                                             |
| SC-94    | 99,0     | 1,0     | -      | -        | 55,70                       | 0,39                  | -                                                | -                                                | -4,37                                             | -0,62                                             |
| SC-95    | 88,4     | 11,6    | -      | -        | 51,67                       | 0,66                  | -6,49                                            | -4,35                                            | -3,23                                             | -0,66                                             |
| SC-97    | 86,1     | 13,9    | -      | -        | 53,47                       | 0,54                  | -6,06                                            | -5,95                                            | -2,44                                             | -1,07                                             |
| SC-101   | 98,0     | 2,0     | -      | -        | 53,33                       | 0,69                  | -                                                | -                                                | -3,84                                             | -0,58                                             |
| SC-102   | 98,0     | 2,0     | -      | -        | 52,07                       | 0,57                  | -                                                | -                                                | -1,90                                             | -0,68                                             |
| SC-103   | 99,5     | 0,5     | -      | -        | 52,50                       | 0,44                  | -                                                | -                                                | -3,41                                             | -0,85                                             |
| SC-104   | 99,0     | 1,0     | -      | -        | 53,47                       | 0,67                  | -                                                | -                                                | -3,93                                             | -0,10                                             |
| SC-105   | 96,1     | 3,9     | -      | -        | 55,37                       | 0,58                  | -3,88                                            | -0,01                                            | -3,54                                             | 0,23                                              |
| SC-106-A | 99,5     | 0,5     | -      | -        | 54,70                       | 0,58                  | -                                                | -                                                | -4,26                                             | -0,6                                              |
| SC-106-B | -        | 100,0   | -      | -        | -                           | -                     | -9,08                                            | -8,06                                            | -                                                 | -                                                 |
| SC-107   | 99,0     | 1,0     | -      | -        | 54,17                       | 0,34                  | -                                                | -                                                | -4,68                                             | -0,77                                             |
| SC-114   | 98,5     | 1,5     | -      | -        | 54,00                       | 0,45                  | -                                                | -                                                | -3,10                                             | -0,35                                             |
| SC-115   | 99,5     | 0,5     | -      | -        | 53,00                       | 0,72                  | -                                                | -                                                | -0,35                                             | -0,45                                             |
| SC-116   | 98,0     | 2,0     | -      | -        | 52,83                       | 0,47                  | -                                                | -                                                | -3,64                                             | -1,49                                             |
| SC-121   | 98,5     | 1,5     | -      | -        | 52,67                       | 0,49                  | -                                                | -                                                | -3,49                                             | -1,17                                             |
| SC-123   | 96,9     | 3,1     | -      | -        | 54,70                       | 0,60                  | -4,76                                            | -2,58                                            | -2,36                                             | -1,52                                             |

**Table S1 (cont).** Mineral and isotopic composition of ME brecciid dolostone geobody.

|               | Dolomite | Calcite | Quartz | Feldspar | %CaCO <sub>3</sub><br>(dol) | I(015)/I(110)<br>dol | $\delta^{13}\text{C}_{\text{VPDB}}$<br>(calcite) | $\delta^{18}\text{O}_{\text{VPDB}}$<br>(calcite) | $\delta^{13}\text{C}_{\text{VPDB}}$<br>(dolomite) | $\delta^{18}\text{O}_{\text{VPDB}}$<br>(dolomite) |
|---------------|----------|---------|--------|----------|-----------------------------|----------------------|--------------------------------------------------|--------------------------------------------------|---------------------------------------------------|---------------------------------------------------|
| <b>SC-124</b> | 97,9     | 2,1     | -      | -        | 54,37                       | 0,33                 | -                                                | -                                                | -3,79                                             | -0,95                                             |
| <b>FHE-4</b>  | <1       | 84,5    | 14,3   | -        | -                           | -                    | -                                                | -                                                | -                                                 | -                                                 |
| <b>FHE-1</b>  | 7,0      | 90,0    | 3,0    | -        | 53,63                       | -                    | -2,94                                            | -5,31                                            | -2,98                                             | -6,36                                             |
| <b>FHE-5</b>  | 30,6     | 59      | -      | 10,4     | 51,80                       | 0,53                 | -                                                | -                                                | -                                                 | -                                                 |
| <b>FHE-6</b>  | 35,2     | 47,6    | 17,1   | -        | 50,37                       | 0,88                 | -                                                | -                                                | -                                                 | -                                                 |
| <b>FHE-6a</b> | 40,9     | 48,3    | <5     | 6,7      | 50,23                       | 0,64                 | -                                                | -                                                | -                                                 | -                                                 |

*Section/quarries/outcrops: JUM-Jumilla (Murcia); FUEN-Sierra de la Fuente (Murcia); JIM-Sierra de la Cingla (Murcia); FV-Sierra de la Magdalena Oeste (Murcia); Y-Sierra de la Magdalena Este (Yecla, Murcia); SP- and SPS-Sierra del Príncipe (Murcia); SC-Sierra del Cuchillo (Albacete); FHE-Fuente la Higuera (Valencia).*
